# Supplementary material
Source: publisher site journal article supplement (https://www.dovepress.com/article/312671)
Supplement: Supplementary file 1 [file get_supplementary_file.php]

**Supplementary Materials**

**This document includes:**

Supplementary Table 1

Supplementary Table 2

Supplementary Figure 1

Supplementary Figure 2

Supplementary Figure 3

**Supplementary Table 1.** Results of the sensitivity analyses that included the body mass index or waist circumference as one of the covariates.

|  | ***β*** | ***t*** | ***p*** |
| --- | --- | --- | --- |
| **Relationship with the CBF in cluster 1 (right middle temporal and lateral occipital cortices)** | | | |
| **Sensitivity analysis 1: Age, sex, mean CBF, and body mass index as covariates** | | | |
| Sleep efficiency | 0.10 | 1.54 | 0.13 |
| WASO | -0.13 | -2.13 | 0.036 |
| Total sleep time | -0.03 | -0.49 | 0.62 |
| Sleep latency | -0.03 | -0.44 | 0.66 |
| **Sensitivity analysis 2: Age, sex, mean CBF, and waist circumference as covariates** | | | |
| Sleep efficiency | 0.11 | 1.76 | 0.082 |
| WASO | -0.13 | -2.28 | 0.026 |
| Total sleep time | -0.01 | -0.23 | 0.82 |
| Sleep latency | -0.04 | -0.61 | 0.55 |
| **Relationship with the CBF in cluster 2 (right orbitofrontal cortex)** | | | |
| **Sensitivity analysis 1: Age, sex, mean CBF, and body mass index as covariates** | | | |
| Sleep efficiency | 0.22 | 3.22 | 0.002* |
| WASO | -0.23 | -3.45 | 0.001* |
| Total sleep time | 0.03 | 0.36 | 0.72 |
| Sleep latency | -0.14 | -2.10 | 0.039 |
| **Sensitivity analysis 2: Age, sex, mean CBF, and waist circumference as covariates** | | | |
| Sleep efficiency | 0.23 | 3.46 | 0.001* |
| WASO | -0.23 | -3.62 | 0.001* |
| Total sleep time | 0.04 | 0.65 | 0.52 |
| Sleep latency | -0.15 | -2.27 | 0.026 |
| **Relationship with the CBF in cluster 3 (right insular cortex)** | | | |
| **Sensitivity analysis 1: Age, sex, mean CBF, and body mass index as covariates** | | | |
| Sleep efficiency | 0.18 | 2.34 | 0.022 |
| WASO | -0.19 | -2.65 | 0.010* |
| Total sleep time | 0.03 | 0.39 | 0.70 |
| Sleep latency | -0.10 | -1.37 | 0.17 |
| **Sensitivity analysis 2: Age, sex, mean CBF, and waist circumference as covariates** | | | |
| Sleep efficiency | 0.17 | 2.38 | 0.020 |
| WASO | -0.19 | -2.66 | 0.010* |
| Total sleep time | 0.04 | 0.50 | 0.62 |
| Sleep latency | -0.10 | -1.45 | 0.15 |

**p*<0.013

Abbreviations: CBF, cerebral blood flow; WASO, wake after sleep onset

**Supplementary Table 2.** The relationship between the scores of self-report questionnaires and the CBF of each cluster

|  | ***β*** | ***t*** | ***p*** |
| --- | --- | --- | --- |
| **Relationship with the CBF in cluster 1 (right middle temporal and lateral occipital cortices)** | | | |
| Athens Insomnia Scale | 0.12 | 2.17 | 0.033 |
| Epworth Sleepiness Scale | 0.15 | 2.51 | 0.014 |
| Fatigue Severity Scale | 0.06 | 1.03 | 0.31 |
| Karolinska Sleepiness Scale | -0.02 | -0.33 | 0.74 |
| Pittsburgh Sleep Quality Index | 0.07 | 1.11 | 0.27 |
| **Relationship with the CBF in cluster 2 (right orbitofrontal cortex)** | | | |
| Athens Insomnia Scale | -0.12 | -1.92 | 0.059 |
| Epworth Sleepiness Scale | 0.04 | 0.55 | 0.59 |
| Fatigue Severity Scale | -0.04 | -0.54 | 0.59 |
| Karolinska Sleepiness Scale | -0.09 | -1.45 | 0.15 |
| Pittsburgh Sleep Quality Index | -0.11 | -1.70 | 0.094 |
| **Relationship with the CBF in cluster 3 (right insular cortex)** | | | |
| Athens Insomnia Scale | -0.05 | -0.72 | 0.47 |
| Epworth Sleepiness Scale | 0.09 | 1.30 | 0.20 |
| Fatigue Severity Scale | -0.01 | -0.15 | 0.88 |
| Karolinska Sleepiness Scale | -0.02 | -0.31 | 0.76 |
| Pittsburgh Sleep Quality Index | -0.14 | -2.07 | 0.042 |


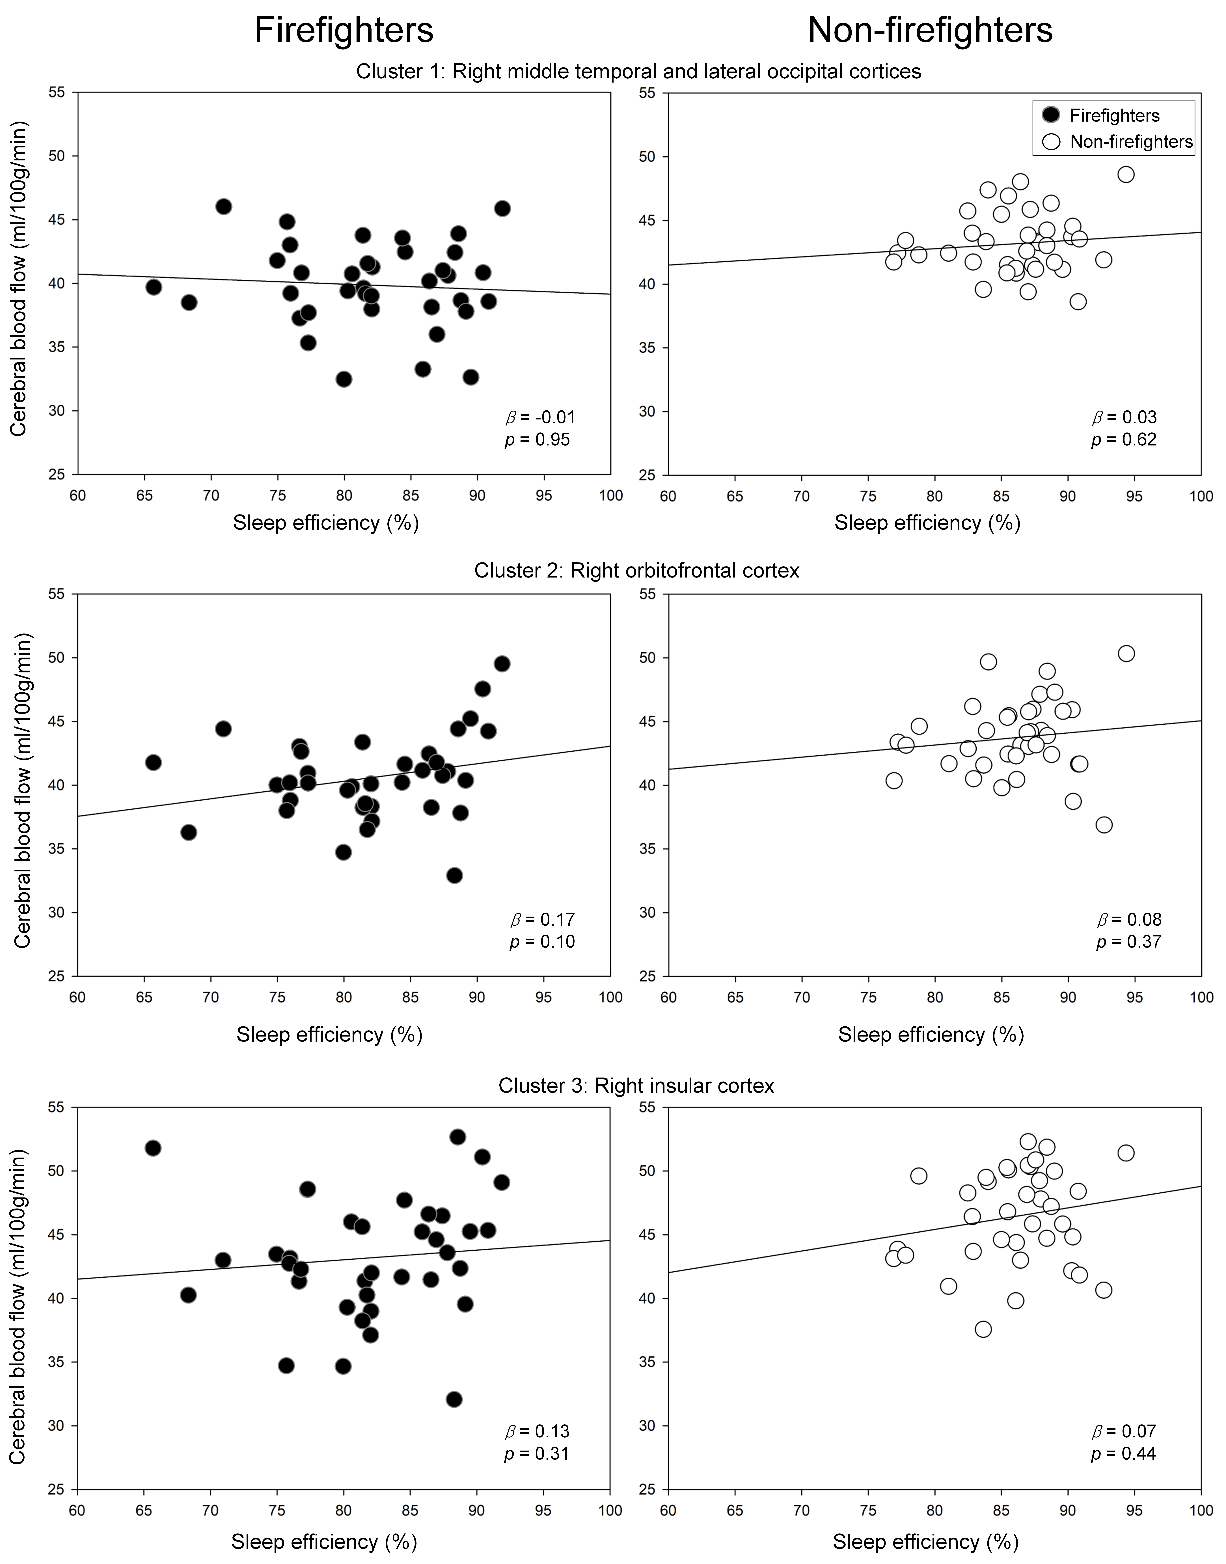


**Supplementary Figure 1.** The relationships between sleep efficiency and cerebral blood flow of the clusters 1-3 in each group. The left and right panels show the results in the firefighters (circles filled with black) and non-firefighters (blank circles), respectively. The regression lines and beta coefficients are from the multivariate regression models including the following variables: the CBF values extracted from each cluster as the dependent variables; sleep efficiency as an independent variable; age, sex, and mean global CBF as covariates. The CBF of each cluster is displayed in the values adjusted for age, sex, and mean global CBF.


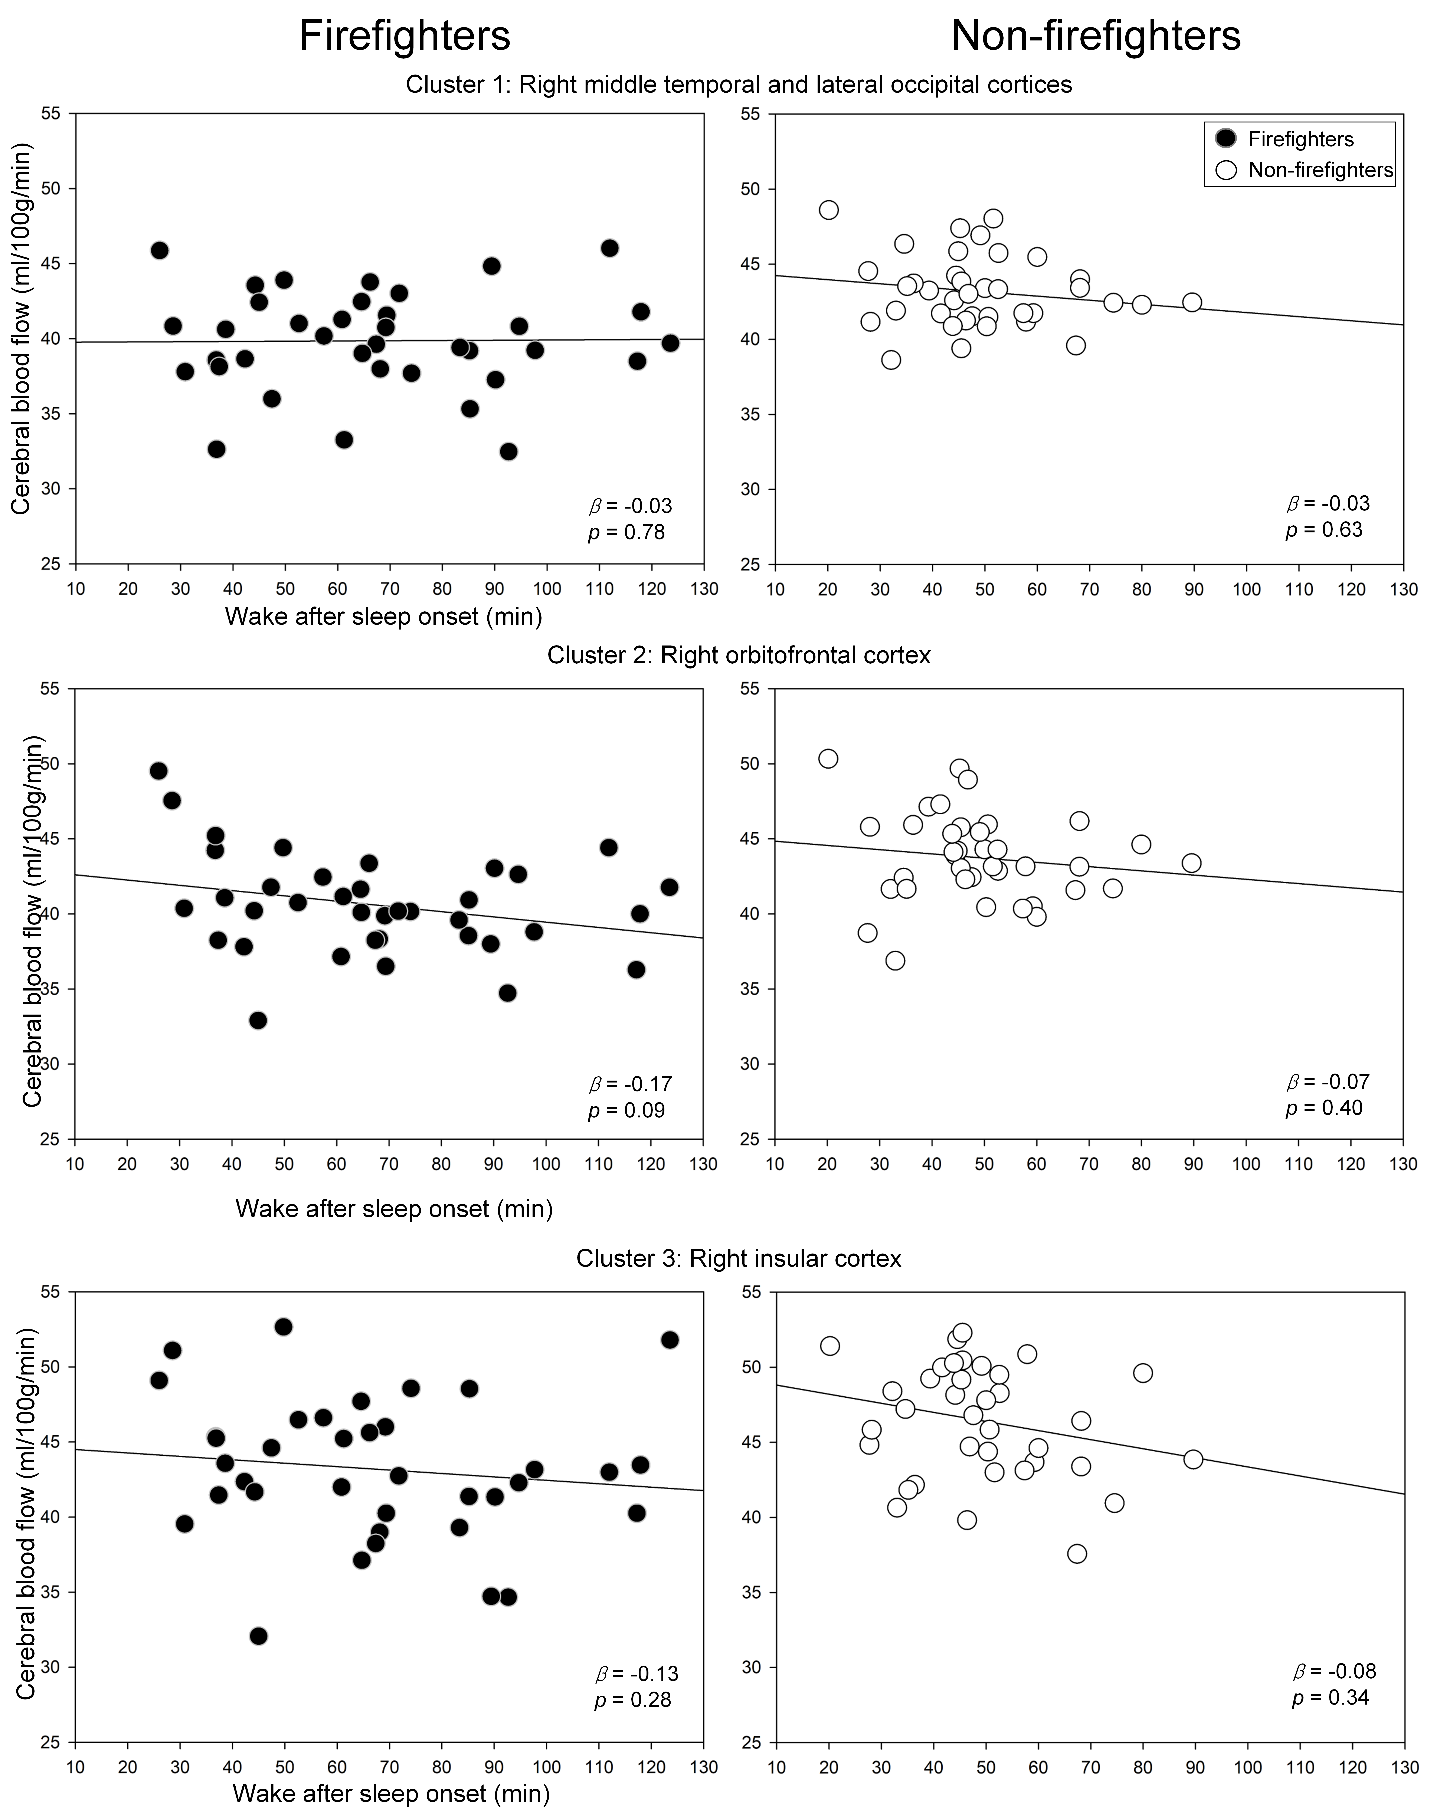


**Supplementary Figure 2.** The relationships between wake after sleep onset and cerebral blood flow of the clusters 1-3 in each group. The left and right panels show the results in the firefighters (circles filled with black) and non-firefighters (blank circles), respectively. The regression lines and beta coefficients are from the multivariate regression models including the following variables: the CBF values extracted from each cluster as the dependent variables; wake after sleep onset as an independent variable; age, sex, and mean global CBF as covariates. The CBF of each cluster is displayed in the values adjusted for age, sex, and mean global CBF.


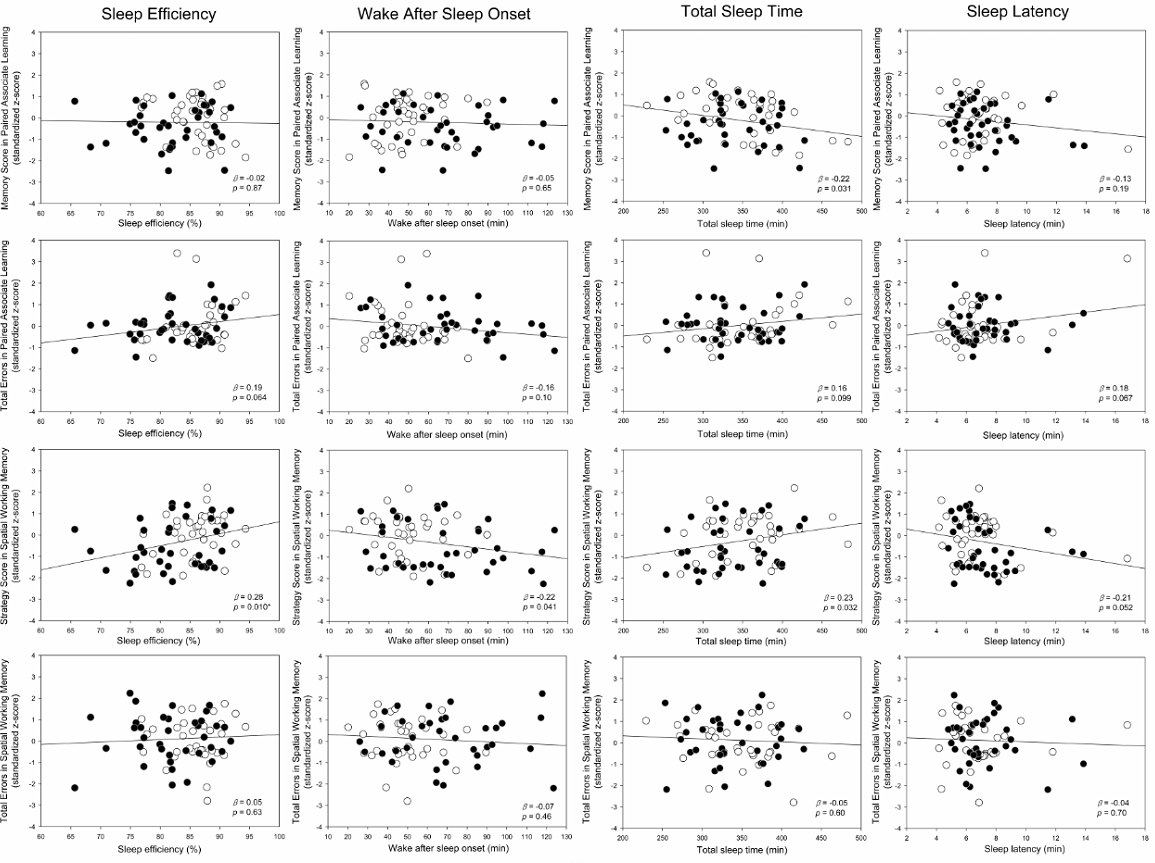


**Supplementary Figure 3.** The relationship between each sleep parameter and cognitive measures. Data in the firefighters are shown in circles filled with black, while those of non-firefighter controls are presented in blank circles. The regression lines and beta coefficients are from the multivariate regression models including the following variables: each cognitive measure as the dependent variable; each sleep measure as an independent variable; age, sex, and education level as covariates. The plot showing the relationship between sleep efficiency and strategy score of the Spatial Working Memory task showed is the same as Figure 3 of the main text.
